# Supplementary material for: PIRATE project: point-of-care, informatics-based randomised controlled trial for decreasing overuse of antibiotic therapy in Gram-negative bacteraemia
Source: PubMed Central journal article supplement — BMJ Open. 2017 Jul 13;7(7):e017996. doi: 10.1136/bmjopen-2017-017996 (PMC5541592; doi:10.1136/bmjopen-2017-017996), 2017-07-13
Supplement: bmjopen-2017-017996.draft_revisions.pdf [file bmjopen-2017-017996.draft_revisions.pdf]

## PEER REVIEW HISTORY

BMJ Open publishes all reviews undertaken for accepted manuscripts. Reviewers are asked to complete a checklist review form (<http://bmjopen.bmj.com/site/about/resources/checklist.pdf>) and are provided with free text boxes to elaborate on their assessment. These free text comments are reproduced below.

## ARTICLE DETAILS

|                            |                                                                                                                                                                        |
|----------------------------|------------------------------------------------------------------------------------------------------------------------------------------------------------------------|
| <b>TITLE (PROVISIONAL)</b> | The PIRATE PROJECT: a Point-of-care, Informatics-based Randomized, controlled trial for decreasing over-utilization of Antibiotic Therapy in gram-negative bacteraemia |
| <b>AUTHORS</b>             | HUTTNER , Angela; Albrich, Werner; Bochud, Pierre-Yves; Gayet-Ageron, Angele; Rossel, Anne; von Dach, Elodie; Harbarth, Stephan; Kaiser, Laurent                       |

This article was not externally reviewed at BMJ Open. Protocols that have been independently assessed prior to submission to BMJ Open are usually fast-tracked to publication on the grounds that further substantial changes will not be possible. This independent assessment will usually be external, independent review for both a substantial grant award from a non-commercial or government funder and ethics approval.
